# Supplementary material for: Characterizing the breast cancer lipidome and its interaction with the tissue microbiota
Source: PubMed Central journal article supplement (PMC8551188; doi:10.1038/s42003-021-02710-0), 2021-10-27
Supplement: 42003_2021_2710_MOESM1_ESM.pdf [file 42003_2021_2710_MOESM1_ESM.pdf]

**Supplementary Table S1.** Clinical data. Ductal carcinoma in situ (DCIS)

| Subject      | Age | Tissue type     | Type of tumour    | Stage of cancer | Parous  | Menarche |
|--------------|-----|-----------------|-------------------|-----------------|---------|----------|
| <b>BTS1</b>  | 61  | normal adjacent | DCIS              | 0               | n       | post     |
| <b>BTS2</b>  | 87  | normal adjacent | invasive lobular  | 1               | y       | post     |
| <b>BTS4</b>  | 64  | normal adjacent | invasive lobular  | 1               | y       | post     |
| <b>BTS5</b>  | 73  | normal adjacent | invasive ductal   | 1               | y       | post     |
| <b>BTS6</b>  | 60  | normal adjacent | invasive ductal   | 1               | y       | post     |
| <b>BTS8</b>  | 68  | normal adjacent | invasive ductal   | 1               | y       | post     |
| <b>BTS11</b> | 90  | normal adjacent | Invasive lobular  | 2               | y       | post     |
| <b>BTS12</b> | 71  | normal adjacent | DCIS              | 0               | y       | post     |
| <b>BTS15</b> | 60  | normal adjacent | Invasive ductal   | 1               | y       | post     |
| <b>BTS16</b> | 54  | normal adjacent | invasive          | 3               | unknown | post     |
| <b>BTS17</b> | 58  | normal adjacent | Invasive          | 2               | unknown | post     |
| <b>BTS18</b> | 68  | normal adjacent | Invasive lobular  | 2               | unknown | post     |
| <b>BTS20</b> | 66  | normal adjacent | DCIS              | 0               | y       | post     |
| <b>BTS22</b> | 67  | normal adjacent | invasive ductal   | 3               | y       | post     |
| <b>BTS23</b> | 63  | normal adjacent | DCIS (multifocal) | 0               | y       | post     |
| <b>BTS24</b> | 57  | normal adjacent | DCIS              | 0               | y       | post     |
| <b>BTS26</b> | 73  | normal adjacent | invasive ductal   | 2               | y       | post     |
| <b>BTS27</b> | 80  | normal adjacent | invasive lobular  | 3               | y       | post     |
| <b>BTS28</b> | 74  | normal adjacent | Invasive ductal   | 1               | y       | post     |
| <b>BTS31</b> | 62  | normal adjacent | invasive ductal   | 4               | y       | post     |
| <b>BTS32</b> | 50  | normal adjacent | invasive ductal   | 2               | n       | pre      |
| <b>BTS34</b> | 70  | normal adjacent | invasive ductal   | 1               | y       | post     |
| <b>BTS35</b> | 65  | normal adjacent | DCIS              | 0               | y       | post     |
| <b>BTS36</b> | 54  | normal adjacent | invasive ductal   | 1               | unknown | post     |
| <b>BTS37</b> | 59  | normal adjacent | invasive ductal   | 3               | y       | post     |
| <b>BTS38</b> | 66  | normal adjacent | Invasive ductal   | 1               | y       | post     |

|              |    |                 |                                                      |               |         |         |
|--------------|----|-----------------|------------------------------------------------------|---------------|---------|---------|
| <b>BTS39</b> | 54 | normal adjacent | Infiltrating mammary carcinoma with lobular features | 1             | n       | post    |
| <b>BTS40</b> | 69 | normal adjacent | invasive mammary carcinoma                           | 1             | y       | post    |
| <b>BTS41</b> | 58 | normal adjacent | invasive mammary carcinoma                           | 1             | y       | post    |
| <b>BTS42</b> | 47 | normal adjacent | invasive mammary carcinoma                           | 2             | y       | pre     |
| <b>BTS43</b> | 68 | normal adjacent | invasive mammary carcinoma                           | 1             | y       | post    |
| <b>BTS45</b> | 61 | normal adjacent | invasive mammary carcinoma                           | 2             | y       | post    |
| <b>BTS46</b> | 69 | normal adjacent | invasive mammary carcinoma                           | 1             | y       | post    |
| <b>BTS48</b> | 82 | normal adjacent | Invasive mammary carcinoma                           | 2             | n       | post    |
| <b>BTS50</b> | 57 | normal adjacent | invasive lobular                                     | 3             | y       | post    |
| <b>BTS51</b> | 58 | normal adjacent | invasive mammary carcinoma, tubular features         | 2             | y       | post    |
| <b>BTS53</b> | 51 | normal adjacent | encapsulated papillary carcinoma                     | 0             | y       | pre     |
| <b>BTS54</b> | 80 | normal adjacent | invasive mammary carcinoma                           | 1             | y       | post    |
| <b>BTS55</b> | 46 | normal adjacent | invasive mammary carcinoma, tubular features         | 2             | y       | pre     |
| <b>BTS56</b> | 60 | normal adjacent | invasive mammary carcinoma                           | 2             | y       | post    |
| <b>BTS57</b> | 73 | normal adjacent | invasive mammary carcinoma                           | 1             | y       | post    |
| <b>BTS58</b> | 75 | normal adjacent | metastatic lung cancer 4 yrs prior                   | n/a           | y       | post    |
|              |    |                 |                                                      |               |         |         |
| <b>HS1</b>   | 47 | normal          | N/A (breast reductions)                              | N/A (healthy) | y       | pre     |
| <b>HS2</b>   | 42 | normal          | N/A (breast augmentation)                            | N/A (healthy) | unknown | pre     |
| <b>HS3</b>   | 21 | normal          | N/A (breast reductions)                              | N/A (healthy) | n       | pre     |
| <b>HS4</b>   | 53 | normal          | N/A (breast reductions)                              | N/A (healthy) | unknown | unknown |
| <b>HS5</b>   | 46 | normal          | N/A (breast reductions)                              | N/A (healthy) | y       | pre     |
| <b>HS6</b>   | 45 | normal          | N/A (breast reductions)                              | N/A (healthy) | y       | pre     |
| <b>HS7</b>   | 61 | normal          | N/A (breast reductions)                              | N/A (healthy) | y       | post    |
| <b>HS8</b>   | 55 | normal          | N/A (breast reductions)                              | N/A (healthy) | y       | pre     |
| <b>HS10</b>  | 39 | normal          | N/A (breast reductions)                              | N/A (healthy) | y       | pre     |
| <b>HS11</b>  | 54 | normal          | N/A (breast reductions)                              | N/A (healthy) | unknown | post    |
| <b>HS12</b>  | 56 | normal          | N/A (breast reductions)                              | N/A (healthy) | y       | post    |
| <b>HS13</b>  | 58 | normal          | N/A (breast reductions)                              | N/A (healthy) | y       | post    |
| <b>HS14</b>  | 59 | normal          | N/A (breast reductions)                              | N/A (healthy) | y       | post    |
| <b>HS15</b>  | 52 | normal          | N/A (breast reductions)                              | N/A (healthy) | y       | post    |
| <b>HS16</b>  | 22 | normal          | N/A (breast augmentation)                            | N/A (healthy) | n       | pre     |
| <b>HS17</b>  | 57 | normal          | N/A (breast reductions)                              | N/A (healthy) | y       | post    |

|             |    |        |                         |               |   |      |
|-------------|----|--------|-------------------------|---------------|---|------|
| <b>HS18</b> | 32 | normal | N/A (breast reductions) | N/A (healthy) | y | pre  |
| <b>HS19</b> | 54 | normal | N/A (breast reductions) | N/A (healthy) | y | post |
| <b>HS20</b> | 69 | normal | N/A (breast reductions) | N/A (healthy) | y | post |
