# Supplementary material for: Characterizing the breast cancer lipidome and its interaction with the tissue microbiota
Source: PubMed Central journal article supplement (PMC8551188; doi:10.1038/s42003-021-02710-0), 2021-10-27
Supplement: 42003_2021_2710_MOESM2_ESM.pdf [file 42003_2021_2710_MOESM2_ESM.pdf]

## Description of Additional Supplementary Files

**File name:** Supplementary Data.

**Description:** Processed lipidomics and microbiome data used in the figures.
